# Supplementary material for: Enantioselective deprotonation reactions using polymer-supported chiral magnesium amide bases
Source: Royal Society of Chemistry journal article supplement (doi:10.1039/b104417f), 2001-01-01
Supplement: b104417f.doc [file b104417f.doc]

# Supporting Information

**Enantioselective deprotonation reactions using polymer-supported chiral magnesium amide bases**

Kenneth W. Henderson,* William J. Kerr* and Jennifer H. Moir

*Department of Pure and Applied Chemistry, University of Strathclyde, 295 Cathedral Street, Glasgow, Scotland, UK G1 1XL. E-mail:* [w.kerr@strath.ac.uk](mailto:w.kerr@strath.ac.uk)

Representative experimental procedure: To a Schlenk flask, under N2, was added resin (*R*)-**2** (1.35 mmol g-1, 1.54 g, 2.08 mmol) which was swollen in THF (10 mL) for 10 min. Meanwhile, Bu2Mg (1.27 mL of a 0.79 M solution in heptane, 1.0 mmol) was charged to a second Schlenk flask, under N2, followed by removal of the heptane *in vacuo* and replacement with THF (5 mL). The resultant solution was then transferred *via* cannula to the pre-swollen resin and the mixture heated to reflux for 90 min. Upon slowly cooling to -78˚C, TMSCl (0.50 mL, 4.0 mmol) and DMPU (0.06 mL, 0.5 mmol) were added. After stirring for 20 min, **3a** (123 mg, 0.8 mmol) was added as a solution in THF (2 mL) over 1 h using a syringe pump. The reaction was allowed to stir for a further 3 h and then quenched by the addition of saturated aqueous NaHCO3 (5 mL). After warming to room temperature, the mixture was filtered using a glass sinter funnel and the resin successively washed with ether (5 x 20 mL). The resultant filtrate was then washed with saturated aqueous NaHCO3 (2 x 20 mL) and the combined aqueous phase was extracted with ether (2 x 20 mL). The combined organic phase was then dried (Na2SO4) and the solvent removed *in vacuo*. The reaction conversion was determined as 78% by GC analysis [CP SIL 19CB fused silica capillary column; carrier gas H2 (80 kPa); 45˚C (1 min)-190˚C; temperature gradient: 45˚C/min; *t*R = 4.2 min (**3a**); *t*R = 4.4 min (**4a**)]. Flash column chromatography (eluting with petrol/ether 9:1) afforded (*S*)-4-*tert*-butyl-1-trimethylsiloxy-1-cyclohexene (*S*)-**4a** (112 mg, 62%) as a clear oil which displayed an enantiomeric ratio of 74:26 {Chirasil-DEX CB capillary column; carrier gas H2 (80 kPa); 80˚C (1 min)-120˚C; temperature gradient: 1.8˚C/min; *t*R = 19.4 min [(*S*)-**4a**]; *t*R = 19.7 [(*R*)-**4a**]}.
